# Supplementary material
Source: PubMed Central journal article supplement (PMC6800359)
Supplement: pnas.1911632116.sapp.pdf [file pnas.1911632116.sapp.pdf]

1

## 2 **Supplementary Information for**

### 3 **Folding RNA in mixtures of monovalent and divalent cations: Theory and simulations**

4 **Hung T. Nguyen, Naoto Hori and D. Thirumalai**

5 **Corresponding Author D. Thirumalai**  
6 **E-mail: [dave.thirumalai@gmail.com](mailto:dave.thirumalai@gmail.com)**

#### 7 **This PDF file includes:**

- 8     Supplementary text
- 9     Figs. S1 to S10
- 10    Table S1
- 11    References for SI reference citations

## 12 Supporting Information Text

13 The Supplementary Information is divided into the following sections. The details of the theory used to numerically solve  
14 the RISM integral equation, needed to calculate the potential of mean force between divalent ions and the phosphate groups  
15 are given in Section 1. Section 2 describes the development of the RNA force field, which treats divalent cations explicitly  
16 and the monovalent ions implicitly. We also describe the methods used to determine the values of the force field parameters.  
17 The simulation details and methods used to analyze the data are given in Section 3. Additional tests of the validity of the  
18 theory-based construction of the RNA model and simulations are contained in Section 4.

### 19 1. Divalent ion–phosphate potential of mean force

20 **Reference Interaction Site Model (RISM).** Accurate simulations using coarse-grained models of even modestly sized RNA  
21 molecules in explicit monovalent and divalent cations is computationally demanding (1). In order to simplify the problem,  
22 while still retaining high level of accuracy achieved previously (1), we treat the electrostatic effects due to monovalent ions  
23 implicitly. This leaves us with the task of calculating the effective interactions between the divalent cations and RNA. Our  
24 primary goal is to calculate the potential of mean force (PMF),  $W(r)$ , between  $\text{Mg}^{2+}/\text{Ca}^{2+}$  and phosphate (Eq. 5 in the main  
25 text), which can be used in simulations of divalent cation-induced folding of RNA. In order to calculate  $W(r)$ , we resort to the  
26 well-known RISM theory, which was developed to calculate the equilibrium site-site distributions of polyatomic liquids and  
27 their associated thermodynamic properties (2–8). The theory has two versions: one is a 1-dimensional RISM (or 1D-RISM)  
28 and the other is a 3-dimensional RISM (3D-RISM). The former provides the radial distribution functions,  $g_{ij}(r)$ , between  
29 every interaction site in the system. The latter couples the 1D radial information and the 3D structure of the biomolecule to  
30 yield the solvent structure around the biomolecule in the form of a 3D site distribution function,  $g_i(\mathbf{r})$ , for each solvent site.  
31 Because the theory and implementation are widely known, here we only give a very brief summary of the 1D-RISM that is  
32 most directly relevant to our work.

33 We begin with the Ornstein–Zernike (OZ) equation:

$$34 \quad h(r_{12}) = c(r_{12}) + \rho \int dr_3 c(r_{13}) h(r_{32}), \quad [1]$$

35 where  $r_{ij}$  is the distance between particles  $i$  and  $j$ ,  $c$  is the direct correlation function, and  $h$ —the total correlation function—is  
36 related to the pair distribution function,  $h_{ij}(r_{ij}) \equiv g_{ij}(r_{ij}) - 1$ . In order to solve the OZ equation, it is necessary to use an  
37 appropriate closure relation connecting  $h$  and  $c$ , which we write as:

$$38 \quad g(r_{12}) = \exp[-\beta u(r_{12}) + h(r_{12}) - c(r_{12}) + b(r_{12})], \quad [2]$$

39 or in a short form  $g = \exp[-\beta u + h - c + b]$ . In the above equation,  $u$  is the potential energy function,  $\beta = \frac{1}{k_B T}$  ( $k_B$  is the  
40 Boltzmann constant and  $T$  is the temperature), and  $b$  is an unknown “bridge function”. In the hypernetted-chain approximation  
41 (HNC),  $b$  is zero, giving:

$$42 \quad g_{HNC} = \exp[-\beta u + h - c]. \quad [3]$$

43 The HNC closure gives good results for ionic and polar systems, but not for neutral systems. Moreover, it is difficult to find  
44 converged solutions (6, 9, 10). To resolve these problems, Kovalenko–Hirata (KH) introduced the following closure relation:  
45 (11)

$$46 \quad g_{KH} = \begin{cases} \exp[-\beta u + h - c] & \text{if } g \leq 1 \\ 1 - \beta u + h - c & \text{if } g > 1 \end{cases}. \quad [4]$$

47 The partial series expansion of order- $n$  (PSE- $n$ ) offers a way to interpolate between Eqs. 3 and 4, which improves the results  
48 of the KH closure while circumventing the convergence issues associated with the HNC closure: (12)

$$49 \quad g_{PSE-n} = \begin{cases} \exp[-\beta u + h - c] & \text{if } g \leq 1 \\ \sum_{i=0}^n \frac{[-\beta u + h - c]^i}{i!} & \text{if } g > 1 \end{cases}.$$

50 Hence, KH is the special case of PSE closure when  $n = 1$ . In the limit  $n \rightarrow \infty$ , HNC is obtained.

51 In RISM (as implemented in the Amber force field), the standard Coulomb and Lennard–Jones interaction are used for the  
52 pair-wise non-bonded potential: (13)

$$53 \quad u_{12}(r) = \frac{q_1 q_2}{r} + \varepsilon_{12} \left[ \left( \frac{R_{min,12}}{r} \right)^{12} - 2 \left( \frac{R_{min,12}}{r} \right)^6 \right]. \quad [5]$$

54 Recently, a 12-6-4 LJ potential was proposed to account for the ion-induced dipole moment interaction, which proved to be  
55 important for divalent ions (14). With this scheme, the LJ interaction (the second term in Eq. 5) is modified as:

$$\begin{aligned}
U_{LJ}(r) &= \varepsilon_{12} \left[ \left( \frac{R_{min,12}}{r} \right)^{12} - 2 \left( \frac{R_{min,12}}{r} \right)^6 - 2\kappa R_{min,12}^2 \left( \frac{R_{min,12}}{r} \right)^4 \right] \\
&= \frac{A_{12}}{r^{12}} - \frac{B_{12}}{r^6} - \frac{C_{12}}{r^4},
\end{aligned} \tag{6}$$

where the attractive term  $\frac{C_{12}}{r^4}$  approximately accounts for the charge-induced dipole interaction. For highly charged systems, the potential in Eq. 6 yields accurate values of hydration free energies, ion-oxygen distances in the first hydration shell, and coordination numbers for divalent ions (and later, extending to trivalent and tetravalent ions) (15). A modified parameter set for  $Mg^{2+}$  was subsequently developed to balance the interaction between  $Mg^{2+}$  and water,  $Mg^{2+}$  and specific sites on nucleic acids (16). Here, we adopt these modifications in RISM and treat only the interaction involving  $Mg^{2+}$  (namely,  $Mg^{2+}$ -water and  $Mg^{2+}$ -P) using the 12-6-4 potential (Eq. 6), while the rest (water-water, water-P, P-P and  $Mg^{2+}$ - $Mg^{2+}$ ) are modeled using the standard 12-6 potential,  $U_{LJ}(r) = \frac{A_{12}}{r^{12}} - \frac{B_{12}}{r^6}$ . (The small polarizability of  $Mg^{2+}$  allows us to neglect  $Mg^{2+}$ - $Mg^{2+}$  interactions.) A similar procedure is used to calculate  $Ca^{2+}$ -P interactions.

The RISM equations (Eqs. 1 and 2) are solved iteratively until converged results are obtained. We are interested only in the probability distribution between  $Mg^{2+}$  and phosphate, from which the PMF is computed using  $W(r) = -k_B T \ln g(r)$ .

**Numerical solution of the RISM calculation.** The PMFs between the divalent cations and phosphates were calculated using the 1D-RISM implemented in Amber (13) by modifying the `rism1d` code to include the potential in Eq. 6. The theory requires bulk concentrations and topologies (bond lengths and bond angles) of every molecule and ion in the system as well as the pairwise interaction potentials between them. In our case, the system was comprised of  $Mg^{2+}$  (or  $Ca^{2+}$ ), phosphate and water. The concentration of  $XP_2$  (where  $X = Mg^{2+}$  or  $Ca^{2+}$ ) is 1 mM. We used a 1-dimensional grid with a grid spacing of 0.025 Å and 131,072 grid points. Parameters for  $Mg^{2+}$  and  $Ca^{2+}$  were taken from the Amber force field that takes into account the charge-induced dipole interactions (17). We used the cSPC/E model for water, which introduces van der Waals terms for the hydrogen atoms of the SPC/E water model to prevent them to collapse in RISM (13). For phosphate, we used a single-site representation as in the coarse-grained model rather than an all-atom representation to overcome the convergence problems in RISM. To derive the phosphate parameters, we started with the  $Cl^-$  parameters and tuned  $\epsilon = 0.027$  kcal/mol, and  $R_{min} = 2.6$  Å (Eq. 6) to obtain the location of the first peak in the  $g_{Mg^{2+}-P}(r)$  at around 2.5 Å (see Fig. 7B in the main text), which is somewhat longer than  $Mg^{2+}$ -O distance 2.06 Å in the first hydration shell. Note that the position of the coarse-grained P site is located at the center of geometry of the phosphate group. We found that  $g_{Mg^{2+}-P}(r)$  is not sensitive to the parameters provided the first peak is around 2.5 Å. We iteratively solved the RISM equations using the PSE-3 closure to a residual tolerance of  $10^{-12}$  at 25°C. We emphasize that no simulation was performed at this stage. The pair distribution function between divalent ion-phosphate  $g_{X^{2+}-P}(r)$  ( $X^{2+}$  is  $Mg^{2+}$  or  $Ca^{2+}$ ) is one of the direct outputs of the RISM program, from which we obtain  $W(r) = -k_B T \ln g_{X^{2+}-P}(r)$ .

## 2. Development of coarse-grained TIS model

**Coarse-grained RNA force field.** Our goal is to produce an accurate coarse-grained model, which treats all the key interactions in a manner that can lead to quantitative predictions of thermodynamics and kinetics of RNA with arbitrary length. To this end, we build on the TIS model (18) in order to develop an RNA force field that treats divalent cations explicitly while describing the monovalent effects implicitly. Following our previous study (1, 19), each nucleotide is represented by three interaction sites, corresponding to phosphate (P), ribose (S) and base (B), where P and S represent the backbone; the B site depends on the nature of the nucleotide, and therefore carries the sequence information. The energy function has the following form:

$$U = U_{BA} + U_{EV} + U_{ST} + U_{HB} + U_{EL},$$

where  $U_{BA}$  is the *bonded term*, comprising of bond and angle restraints between connected beads. These constraints use harmonic potentials to keep the bonds and the angles close to the A-form helix. The parameters are the same as in our previous work (1, 19).

**Excluded volume interactions  $U_{EV}$ .** We model  $U_{EV}$  using a modified LJ potential (1), which is evaluated using:

$$U_{EV} = \sqrt{\varepsilon_i \varepsilon_j} \left[ \left( \frac{1.6}{r + 1.6 - D_{ij}} \right)^{12} - 2 \left( \frac{1.6}{r + 1.6 - D_{ij}} \right)^6 + 1 \right]$$

if  $r \leq D_{ij} = R_i + R_j$ . If  $r > D_{ij}$  then we set  $U_{EV} = 0$ . To allow for favorable base stacking, we set  $D_{BB} = 3.2$  Å. It is not necessary to include excluded volume interactions between the divalent cation and P as it is taken into account in the effective potential displayed in Figs. 1 and 7A in the main text. The full set of parameters used in the simulations is given in Table S1.

|                  | Mass, Da | $R_i$ , Å | $\varepsilon_i$ , kcal/mol | $q_i$                   |
|------------------|----------|-----------|----------------------------|-------------------------|
| P                | 62.974   | 1.89      | 0.200                      | (varied, see main text) |
| S                | 131.106  | 2.61      | 0.200                      | 0                       |
| A                | 134.132  | 2.52      | 0.200                      | 0                       |
| G                | 150.132  | 2.70      | 0.200                      | 0                       |
| C                | 110.102  | 2.43      | 0.200                      | 0                       |
| U                | 111.084  | 2.43      | 0.200                      | 0                       |
| Mg <sup>2+</sup> | 24.305   | 2.00      | 0.895                      | +2                      |
| Ca <sup>2+</sup> | 40.078   | 2.80      | 1.000                      | +2                      |

**Table S1.** Parameters for excluded volume and Debye–Hückel interactions.

100 **Justification for the divalent ion excluded volume parameters.** The radius of the divalent cations used in this work to compute the  
101 excluded volume interactions are large (2.00 Å for Mg<sup>2+</sup> and 2.80 Å for Ca<sup>2+</sup>) compared to the values used in atomistic  
102 simulations. In general, the size of various interaction sites has to be larger in coarse-grained models. We justify the value  
103 in Table S1 by arguing that the divalent ion radius in this work represents the fully hydrated form of the ion. For Mg<sup>2+</sup>,  
104 the relevant size is the radius of the hexahydrated form  $Mg(H_2O)_6^{2+}$ , which coincides with the distance between Mg<sup>2+</sup> and  
105 the oxygen atom in the first hydration shell  $d_{Mg^{2+}-O_w} \approx 2.02 - 2.10$  Å. Therefore, in our model, we assume that Mg<sup>2+</sup> ions  
106 do not dehydrate in order to interact with base or sugar moieties and other Mg<sup>2+</sup> ions. Although the most frequent inner  
107 sphere coordination of Mg<sup>2+</sup> occurs with the phosphate groups, it has been documented that Mg<sup>2+</sup> also coordinates with  
108 nucleobases and less frequently with sugars (20). However, the neglect of such interactions, which likely do not contribute to  
109 charge neutralization of the phosphate groups, should not considerably affect the folding of RNA. From the perspective of  
110 folding thermodynamics, it is crucial to treat Mg<sup>2+</sup>–P interactions accurately, which we do rigorously using the RISM theory.  
111 We note that in our model, the divalent ion radius does not play any role in the divalent ion–phosphate interactions since these  
112 interactions are calculated based on the PMF (Eq. 5, main text). We do, therefore, allow the Mg<sup>2+</sup> dehydration once they  
113 are near phosphate groups, as shown in Fig. 1 in the main text. The excellent predictions of the free energies for a variety  
114 of systems reported here show that it is crucial to account for the physics of divalent ion–phosphate interactions. This is  
115 accomplished using the RISM theory.

116 To ascertain that the radius of the divalent ion used here is physically reasonable, we compute the distance between the  
117 Mg<sup>2+</sup> and sugars/bases in the simulations and compare them to the values in the crystal structure. The idea is to see if Mg<sup>2+</sup>  
118 approaches the RNA in the simulations at distances that are too small or large. For the crystal structures, we took all RNA  
119 structures in the PDB that have Mg<sup>2+</sup> and the resolution is at least 2.5 Å. With this criterion, we obtained 147 structures. We  
120 coarse-grained the RNAs and generated the histogram of the distances between Mg<sup>2+</sup>–base and Mg<sup>2+</sup>–sugar. Fig. S1 compares  
121 the radial distribution function  $g_{Mg^{2+}-\alpha}$  computed in the simulations of BWYV and the histogram generated from PDB. In  
122 the histogram, signals in the region  $r < 4.0$  Å arise due to interactions with partially dehydrated Mg<sup>2+</sup> ions, and therefore  
123 are not present in  $g_{Mg^{2+}-\alpha}$ . The key point here is that the closest Mg<sup>2+</sup> could approach either moieties in the simulations  
124 is around 4.0 Å, which is in good agreement with the histogram, and therefore justifies the choice of the divalent ion radius used  
125 in our coarse-grained simulations. In addition, the agreement between our simulations and experimental data for a wide variety  
126 of thermodynamic properties furthermore justifies our choice of the divalent ion radius.

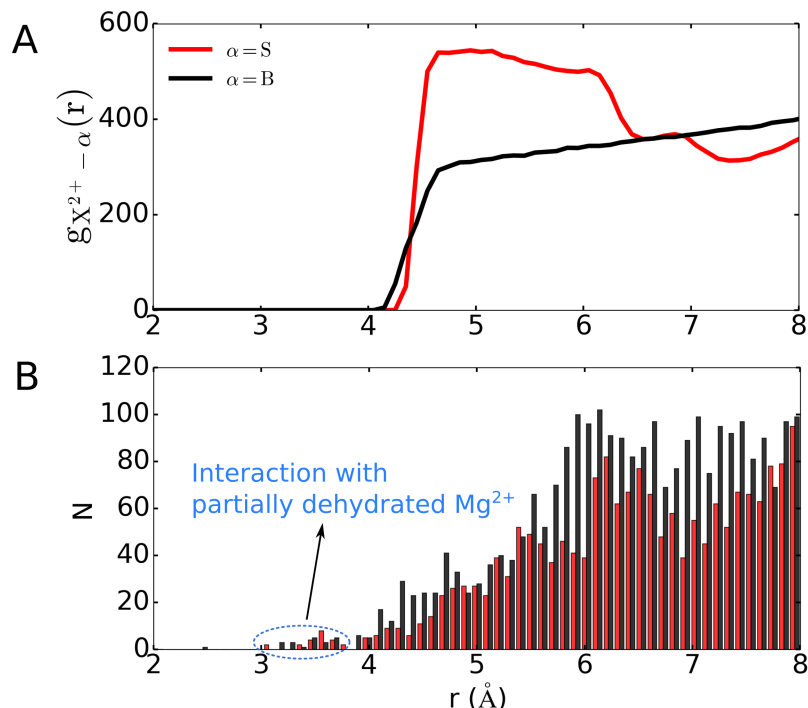

**Fig. S1.** Comparison of the distances between  $\text{Mg}^{2+}$  and sugars (red) and bases (black). (A) Radial distribution function of  $\text{Mg}^{2+}$  and sugar (red) or base (black) calculated in simulations of BWYV. (B) Histogram of the distances between  $\text{Mg}^{2+}$  and sugar (red) or base (black) in 147 RNA structures. There is only a small occurrence of interaction between partially dehydrated  $\text{Mg}^{2+}$  with both sugar and base moieties in RNA at  $r < 4.0$  Å.

127 **Stacking interactions**  $U_{ST}$ . Interactions between two consecutive bases, or secondary stacking, are modeled using  $U_{ST} = \frac{U_{st}^o}{1+u_1}$   
 128 where  $u_1$  is a linear combination of harmonic constraints, which biases the stacking topology to the A-form helix (19), and  
 129  $U_{st}^o = -h + k_B(T - T_m)s$  where  $h$  and  $s$  are independently obtained for the 16 nucleotide dimers by reproducing their  
 130 experimental stacking thermodynamics (19). In the simulations, we computed the stability of the stacked dimers using:

$$131 \quad \Delta G = -k_B T \ln p + k_B T \ln(1-p) + \Delta G_o, \quad [7]$$

132 where  $p$  is the fraction of all sampled conformations for which  $U_{ST} < -k_B T$ . The parameters  $h$  (but not  $s$ ) in  $U_{st}^o$ , thus, are  
 133 functions of a single free energy correction term,  $\Delta G_o$ . The value of  $\Delta G_o$ , assumed to be a constant for all dimers, is used to  
 134 adjust the balance between stacking and hydrogen bonding, which is essential to accurately reproduce RNA thermodynamics  
 135 (see below).

136 Stacking between non-consecutive bases is detected from the input structure using the geometric criteria reported elsewhere  
 137 (21). We evaluated tertiary stacking using  $U_{ST} = \frac{U_s}{1+u_2}$ , where  $U_s = -5.0$  kcal/mol, and  $u_2$  is also a linear combination of  
 138 harmonic constraints, similarly to  $u_1$ , but instead is chosen to bias the stacking topology to the crystal structure. Since a  
 139 base could stack with others on both sides, we keep track of both the number of stacking each side participates in during the  
 140 simulations. Each side is allowed to stack with a maximum of two other bases, and tertiary stacking is given a higher priority  
 141 over secondary stacking. In other words, once tertiary stacks are formed (the two bases are closer than 10.0 Å) and the side  
 142 reaches the maximum stacking capacity then the secondary stacking is disallowed.

143 **Hydrogen bond potential**  $U_{HB}$ . We used  $U_{HB} = N_b U_{hb}^o \exp(-u_2)$  where  $u_2$  has the same form as tertiary stacking, biasing the  
 144 structure towards an A-form RNA for canonical bonds (G-C, A-U and G-U) or the experimental structure for non-canonical  
 145 bonds;  $N_b$  is the number of hydrogen bonds between the beads. For Watson-Crick base pairing,  $N_b$  is 2 for A-U and G-U, and  
 146 3 for G-C. For non-canonical bonds,  $N_b$  is computed from the experimental structure of the RNA. Hydrogen bonds involving S  
 147 and P beads are also considered. We use  $U_{hb}^o = -2.70$  kcal/mol, which is fit in order to reproduce heat capacities of RNA  
 148 hairpins and pseudoknots (Fig. S2). Our model also permits non-native base pairing formed between G and C, A and U, G and  
 149 U separated by at least 4 nucleotides along the chain. Thus, the folded structures can be disrupted, allowing for non-native  
 150 structures to be populated in the simulations. Each bead has a maximum number of hydrogen bonds it could potentially form,  
 151 and one base is involved in only one canonical base-pair.

152 **Choice of  $\Delta G_o$  and  $U_{hb}^o$ .** Following our previous studies, we calibrated the parameters to reproduce known experimental quantities.  
 153 Here, we adjusted  $\Delta G_o$  in Eq. 7 (0.90 kcal/mol) and  $U_{hb}^o$  (-2.70 kcal/mol) to fit the heat capacity of human telomerase RNA  
 154 hairpin (hTR HP) in 200 mM KCl and the Beet Western Yellow Virus pseudoknot (BWYV PK) in 500 mM KCl. In Fig. S2,  
 155 the values of the melting temperatures for both the hTR HP and BWYV PK predicted theoretically are in good agreement  
 156 with experiments.

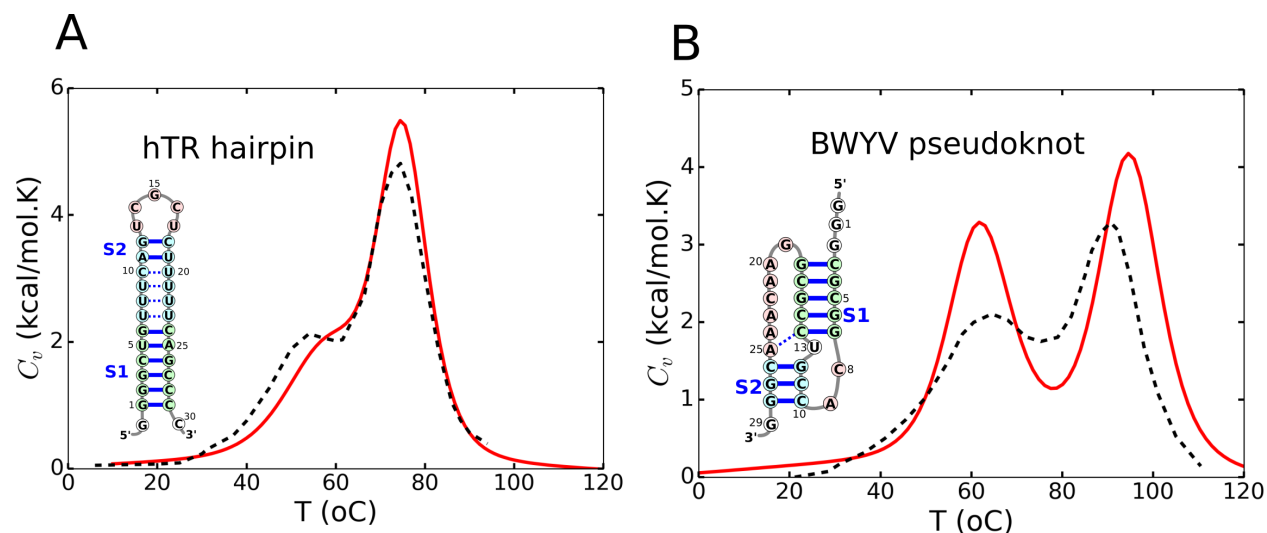

**Fig. S2.** Heat capacity of hTR hairpin (A) and BWYV pseudoknot (B). Simulations were performed for hTR in 200 mM KCl and for BWYV in 500 mM KCl at pH=7.0 with no divalent cations. Experimental data for hTR and BWYV are black dashed lines, taken from Ref. (22) and (23), respectively. Simulation data are shown as red lines.

157 **Electrostatic interactions**  $U_{EL}$ . We developed a new way to treat the interaction of ions with a charged phosphate group. A  
 158 typical buffer used in RNA folding experiments (Tris for example) contains known amount of monovalent ions. To this buffer,  
 159 a solution containing divalent cations is added in order to induce RNA folding. Thus, in such experiments, the solution  
 160 contains a mixture of divalent and monovalent ions. Treating both the ions on equal footing, which we previously carried  
 161 out for a few RNA constructs including the *Azoarcus* ribozyme (1), is computationally demanding. As explained here and in  
 162 the main text, we treated monovalent ions implicitly and  $Mg^{2+}/Ca^{2+}$  explicitly. This procedure is justified because divalent  
 163 cations are indispensable for the folding of most RNAs, with the exception of some small hairpins and pseudoknots. It is,  
 164 therefore, important to include divalent ions explicitly to take into account the ion size and their specific interactions with the  
 165 RNA. On the other hand, the majority of monovalent ions interacts with the RNAs via non-specific electrostatic interactions,  
 166 screening the charge-charge repulsion between phosphate groups. There are few examples where specific interactions between  
 167 monovalent ions and RNA play an essential role in RNA folding (24–26). Hence, it is reasonable to treat the monovalent ion as  
 168 a continuum using classical Debye–Hückel theory. In most RNA folding experiments, the concentration of monovalent ions  
 169 in the buffer solution typically is in far excess of the divalent cation, and therefore they screen the interactions between the  
 170 divalent ions. Thus, we assume that the Debye–Hückel potential accurately describes the electrostatic interactions between  
 171 divalent cations and P–P repulsions. With this approximation,  $U_{EL}$  is the sum of pairwise interactions between all the divalent  
 172 cations, repulsions between the P groups, and attractive interactions between the divalent cations and the P groups. The bare  
 173 charge on P is replaced by an effective charge,  $Q(T, C_1, C_2)$ , which is calculated using the counter ion condensation theory. The  
 174 value of  $Q(T, C_1, C_2)$  depends on the temperature,  $T$ , as well as the concentrations of monovalent ( $C_1$ ) and divalent  
 175 cations ( $C_2$ ). It only remains to determine the interaction between the divalent cations and P, which is given by Eq. 5 in the main text.  
 176 The PMF,  $W(r)$ , is calculated using the RISM theory in liquid state physics, described in the previous section.

177 **Validation of the ion condensation theory.** The assumption of the Oosawa–Manning counter ion condensation theory is that  
 178 ions at distances that are larger than the size of the RNA corresponding to the bulk (B), and the ones condensed (C) onto the  
 179 polyanion are at equilibrium (27). The value of the renormalized charge on the phosphate group is calculated by equating the  
 180 chemical potentials of the B and C ions. In the main text, we derived an approximate expression of charge neutralization  
 181 to obtain the effective charge on the phosphates using this physical picture. In order to assess if our estimate of charge  
 182 renormalization is reasonable, we rely on experimental techniques that probe both the monovalent and divalent ion atmosphere  
 183 around nucleic acids such as ion counting (BE-AES) or anomalous small-angle X-ray scattering (ASAXS) (28–30). Fig. S3  
 184 compares  $\theta_{Na^+}$  and  $\theta_{Mg^{2+}}$ ,  $\theta_i = \frac{\Gamma_i}{N_P} \left(1 - \frac{b}{l_B}\right)$ , computed using the theory at 20 mM NaCl and results from ion counting  
 185 experiment for a 24bp duplex DNA. The experimental  $\theta$  are calculated using the assumption that the total DNA charge  
 186 neutralized is similar to the theory, hence the factor  $\left(1 - \frac{b}{l_B}\right)$ . This is necessary because we set  $b = 4.4 \text{ \AA}$  in our theory and  
 187 simulations. We had to choose DNA because the data for RNA is currently not available. Because of the physics of ion  
 188 condensation likely does not depend greatly on the differences between DNA and RNA, comparison with duplex DNA is  
 189 sufficient to validate our theory. The calculated values are in good agreement with experiments, indicating that our theory  
 190 describes ion competition in a buffer containing both monovalent and divalent cations accurately.

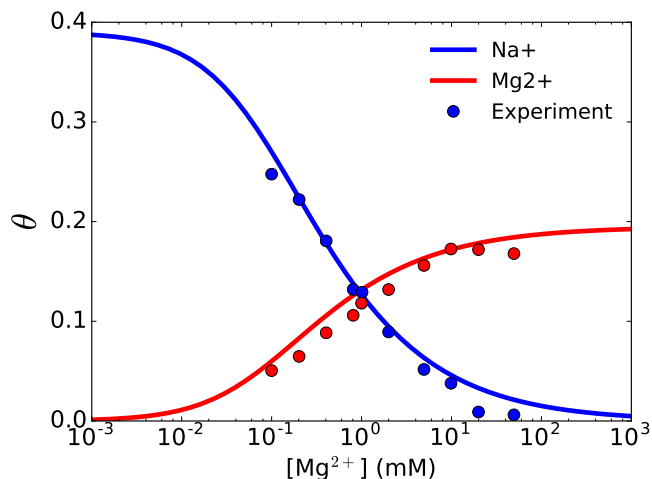

**Fig. S3.** Competition between  $\text{Na}^+$  and  $\text{Mg}^{2+}$  ions around a 24bp DNA duplex. The plot shows the number of condensed ions per phosphate group at a fixed 20 mM NaCl solution as a function of  $\text{Mg}^{2+}$  concentration. Calculations were done by analytically solving Eqs. 3 and 4 (main text). The blue and red circles are experimental data from Ref. (28) and  $\theta_i = \frac{N_i}{N_P} \left(1 - \frac{b}{l_B}\right)$ , with  $b = 4.4 \text{ \AA}$  and  $N_P = 46$  is the total number of phosphate groups in the DNA.

### 191 3. Simulation details and data analyses

192 **Simulations.** We performed simulations using the Langevin dynamics with the CG force field using an in-house code, which is  
 193 available at [https://github.com/tienhungf91/RNA\\_cg](https://github.com/tienhungf91/RNA_cg). Divalent cations were randomly added to a cubic box containing an RNA  
 194 molecule, whose initial coordinates were taken from the structure of the folded state in the PDB. The box size varied from  
 195 700-3,000  $\text{\AA}$  depending on the bulk concentration of divalent cations. We used large boxes to make sure that at least 200  
 196 divalent cations were present in the simulations. Enlarging the box size does not introduce more particles into the system, but  
 197 only dilutes the divalent cation concentration. The performance of our model, therefore, is insensitive to the box size, allowing  
 198 us to probe the effect of the arbitrarily small concentration of divalent cations on RNA folding. This is another advantage  
 199 of treating monovalent ions implicitly. We used periodic boundary conditions in the simulations to minimize the effect of  
 200 finite box size. Numerical integration of the equations of motion was performed using the leap-frog algorithm with the time  
 201 step  $h = 0.05\tau$  where  $\tau = a_0 \sqrt{\frac{m_0}{e_0}}$  is the unit of time,  $a_0 = 1 \text{ \AA}$ ,  $m_0 = 1 \text{ Da}$  and  $e_0 = 1 \text{ kcal/mol}$ . We performed low-friction  
 202 dynamics to increase the sampling efficiency of the conformations, in which the viscosity of water was reduced 100 times (31).  
 203 Snapshots were recorded every 10,000 steps, from which only the last two-thirds were used to compute all the quantities of  
 204 interest.

205 **Calculation of the heat capacity.** We performed replica-exchange simulation (REMD) at several temperatures (32). Exchange  
 206 was attempted every 5,000 steps between neighboring replicas. The system energy was recorded every 10,000 steps, and the  
 207 heat capacity was computed using  $C_v = \frac{\partial U}{\partial T}$  with WHAM. The REMD was found to give converged results after  $\sim 5 \times 10^8$   
 208 integration steps.

209 **Calculation of the folding free energy,  $\Delta G(c)$ .** For a given monovalent concentration  $C_1$ , the folding free energy of the RNA is  
 210 calculated using: (19)

$$211 \quad G(T) = G(T^*) + \frac{\partial G}{\partial T}(T^*)(T - T^*) + T \frac{\partial^2 G}{\partial T^2}(T^*) \left(T^* - T + T \ln \frac{T}{T^*}\right),$$

212 where  $T^*$  is the reference temperature. At temperatures that are low compared to the melting temperature, only the folded  
 213 state of the RNA is predominantly populated. Thus, the free energy of the folded state,  $G_f(T)$ , can be determined by using, for  
 214 instance,  $T^* = 10^\circ\text{C}$  as the reference temperature. Similarly, the free energy of the unfolded state,  $G_u(T)$ , is computed using  
 215  $T^* = 120^\circ\text{C}$ . The free energy of the intermediate state,  $G_i(T)$ , is computed with  $T^*$  in between the two melting temperatures.  
 216 For BWYV PK,  $T^* = 70^\circ\text{C}$  (see Fig. S2). We performed REMD simulations at several temperatures and used WHAM  
 217 to compute  $G(T)$ . The free energy for each state is then calculated using the above equation with appropriate reference  
 218 temperatures. The folding free energy is then evaluated using  $\Delta G_{f-u}(T) = G_f(T) - G_u(T)$ .

219 **Equilibrium between the bulk and condensed ions and  $\Gamma_{X^{2+}}$ .** Because the divalent ions are attracted strongly to the highly  
 220 negatively charged RNA, the actual ion bulk concentration differs from the concentration computed by dividing the total  
 221 number of ions by the volume of the simulation box. Failure to account for the equilibrium between these populations results  
 222 in an incorrect calculation of  $\Gamma_{X^{2+}}$  and  $\Delta G_{X^{2+}-RNA}$ . One could enlarge the simulation box to alleviate this problem, but it  
 223 is computational demanding. Instead, we calculated the ion concentration in the bulk  $C_2$  after the concentration profile of

ions,  $C_2(r)$ , plateaus at large separation from the RNA (Fig. S4). The preferential interaction coefficient is then evaluated as  $\Gamma_{X^{2+}} = C_2 \int \left( \frac{C_2(r)}{C_2} - 1 \right) dr$ . In practice, we truncated the integration at the distance where  $C_2(r) = C_2$ .

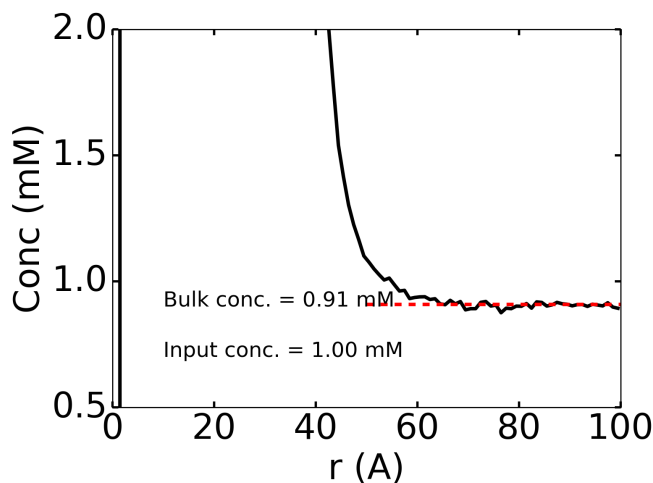

**Fig. S4.** Concentration profile of  $Mg^{2+}$  around adenine riboswitch. The bulk concentration is computed at a large separation from the center-of-mass of the RNA and subsequently used for  $\Gamma_{Mg^{2+}}$  determination.

**$X^{2+}$ -RNA free energy.** The plot of  $\Gamma_{X^{2+}}$  vs.  $\ln C_2$  curve (in Fig. 2 in the main text, for example) ( $X^{2+}$  is either  $Mg^{2+}$  or  $Ca^{2+}$ ) is fit using a fourth order polynomial,  $y = b(x - a)^2 + c(x - a)^3 + d(x - a)^4$  and the fit polynomial is integrated analytically, which allows us to evaluate the integral in Eq. 7 analytically and obtain  $\Delta G_{X^{2+}, RNA}$ .

**Fraction of native contacts.** The fraction of native contacts,  $Q(X_k)$ , for an RNA conformation  $X_k$  is computed using: (33)

$$Q(X_k) = \frac{1}{N} \sum \frac{1}{1 + \exp[\alpha(r_{ij}(X_k) - \lambda r_{ij}^o)]},$$

where the sum runs over  $N$  pairs of native contacts (i,j) separated by  $r_{ij}^o$  in the crystal structure,  $\alpha = 5 \text{ \AA}^{-1}$  is a smoothing parameter and  $\lambda = 1.5$  accounts for fluctuations when contacts formed. The list of  $N$  contacts are determined by native hydrogen bonds and stackings in the PDB structure, including secondary and tertiary interactions.

#### 4. Robustness of the model

**BWYV.** In order to provide additional evidence of the robustness of the force field, we calculated the free energy difference,  $\Delta G_{F-U}(c)$ , between the folded and unfolded states, as a function of monovalent salt concentrations  $C_1$  for BWYV pseudoknot. Fig. S5 shows that the simulated values of  $\Delta G(c)$  are in very good agreement with experiments.



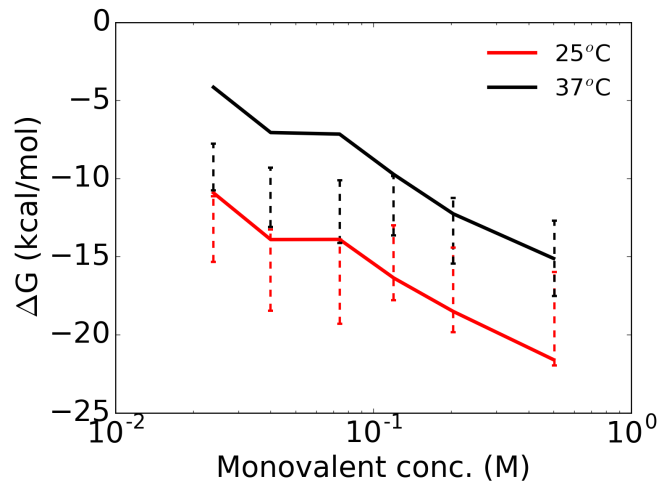

**Fig. S5.** Free energy difference ( $\Delta G$ ) between the folded and unfolded states of BWYV pseudoknot as a function of monovalent concentration ( $C_1$ ) evaluated at 25°C (red) and 37°C (black). Calculated values are plotted as solid lines. The folding enthalpy and entropy reported in Ref. (34) were used to compute the experimental free energies shown with error bars. The calculated values of  $\Delta G$  from simulations are in remarkable agreement with experiments, except for an underestimation at 37°C at low ion concentrations.

238 **58-nt rRNA.** As a further validation, we calculated the heat capacity ( $C_v$ ) of the 58-nt fragment of rRNA (Fig. S6) and compared  
 239 the results with the UV absorbance data (35). The melting temperature at 20 mM KCl, identified with the maximum in  
 240  $C_v$ , agrees reasonably with the experimental data. The value of the high temperature peak in  $C_v$  at 60 mM KCl and 1 mM  
 241  $MgCl_2$  is in good agreement with the experimental data. However, the shoulder at the lower temperature obtained in the  
 242 simulations, if it exists at all, is much less pronounced in experiments. The results in Figs. S2, S5 and S6 show that our RNA  
 243 force field is sufficiently accurate to reproduce many aspects of the thermodynamics for several RNAs over a wide range of ion  
 244 concentrations. It is worth remarking that currently there is no other computational model that can calculate ion-dependent  
 245 folding thermodynamic properties of RNA, such as free energy changes and heat capacities, let alone achieve the level of  
 246 accuracy reported here.

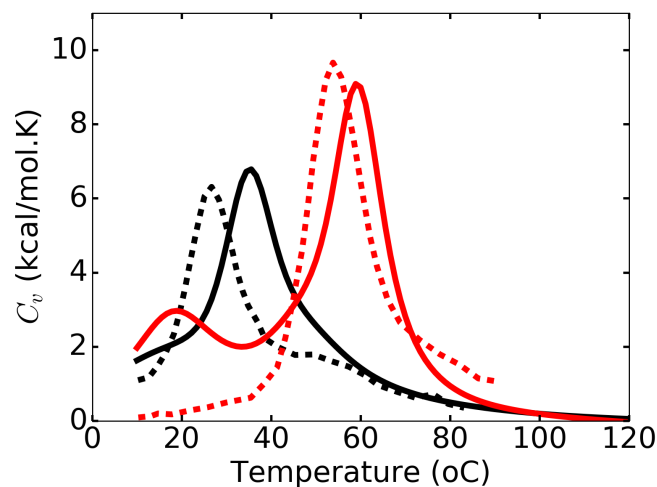

**Fig. S6.** Heat capacity of the 58-nt rRNA at two salt concentrations. Black—20 mM KCl (no  $Mg^{2+}$ ), red—60 mM KCl + 1 mM  $MgCl_2$ . Dashed curves show UV absorbance data from experiments (35), solid lines are from simulations. We should stress that UV absorbance data is not the same physical variable as  $C_v$ , which is computed using the fluctuations in energy. Therefore, for the purposes of comparison, only the peak positions are relevant. The differences in the major melting temperature between the simulations and experiments are  $\sim 9^\circ\text{C}$  at 20 mM KCl (no  $Mg^{2+}$ ) and  $\sim 5^\circ\text{C}$  at 60 mM KCl + 1 mM  $MgCl_2$ . The comparison further demonstrates that the agreement between simulations and experiments is excellent.

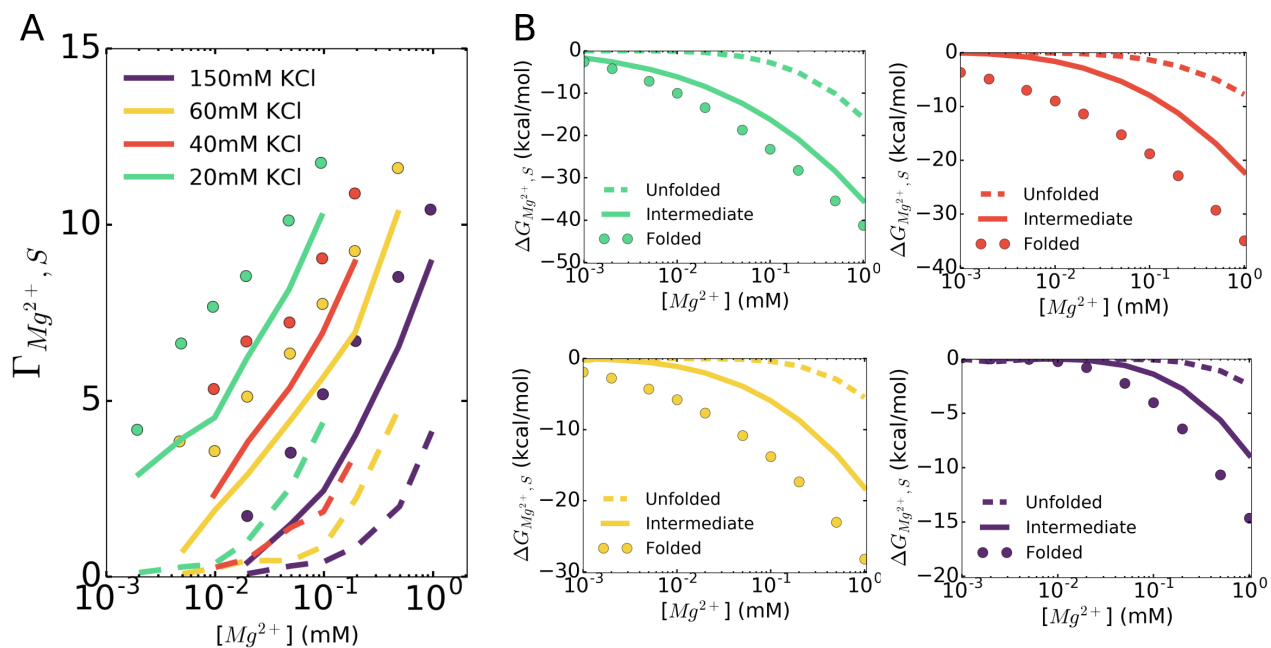

**Fig. S7.** (A)  $\Gamma_{Mg^{2+},S}$  and (B)  $\Delta G_{Mg^{2+},S}$  for the folded, intermediate and unfolded states of 58-nt rRNA. Simulations were performed by constraining the ensemble of RNA conformations to specific states. See the main text for details.

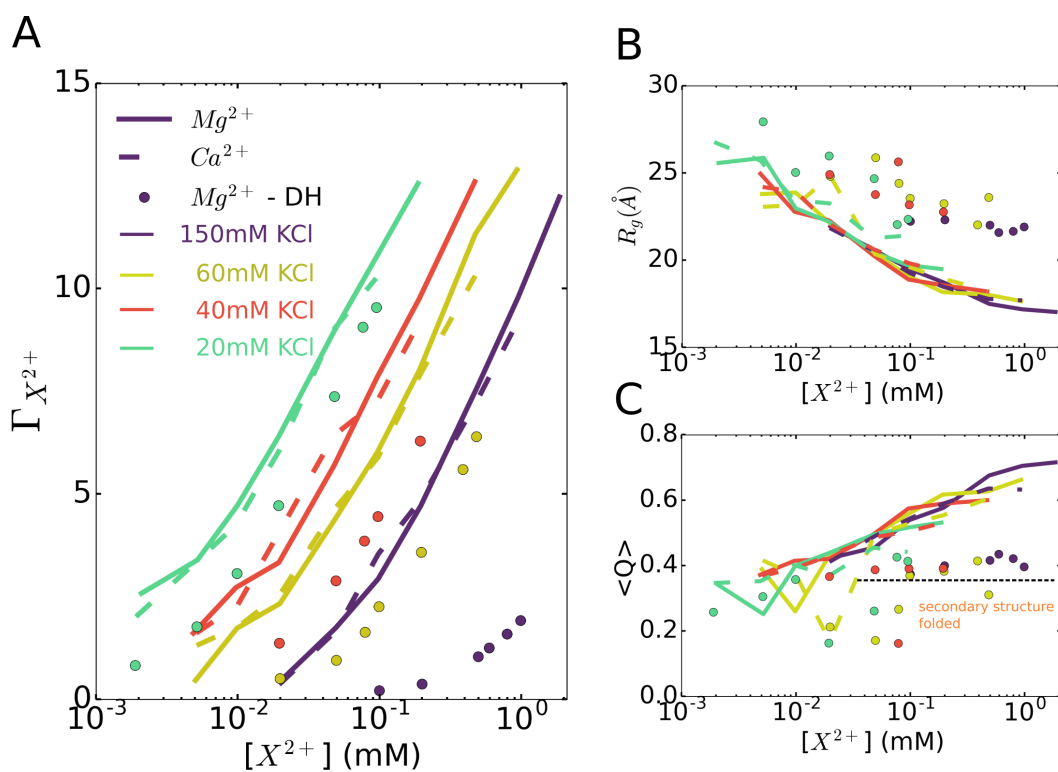

**Fig. S8.** Shown here are the full data for Fig. 7 in the main text for the 58-nt rRNA.

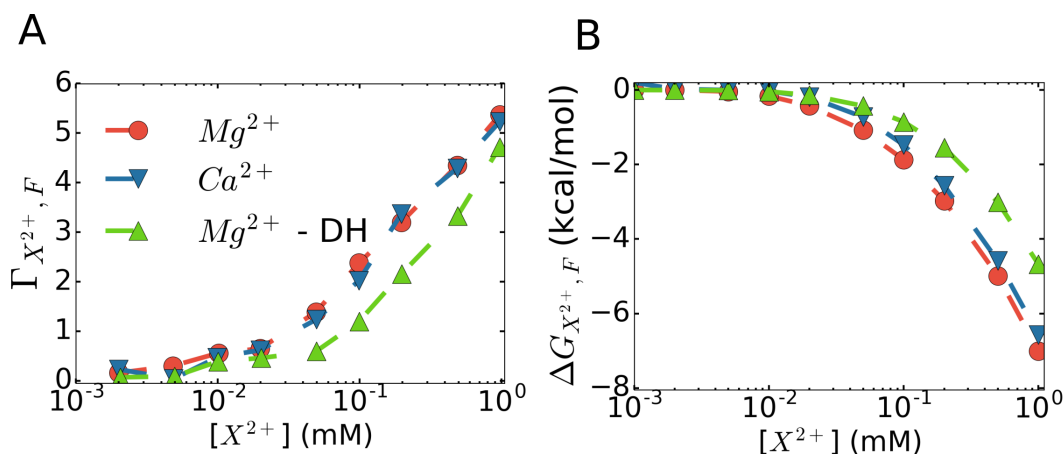

**Fig. S9.** Ion preferential interaction coefficients (A) and free energies of divalent ion–RNA interactions (B) of  $Mg^{2+}$  (red) and  $Ca^{2+}$  (blue) computed for BWYV at 54 mM KCl. Calculations were also performed for  $Mg^{2+}$ , in which the interactions are treated at the Debye–Hückel level (green).

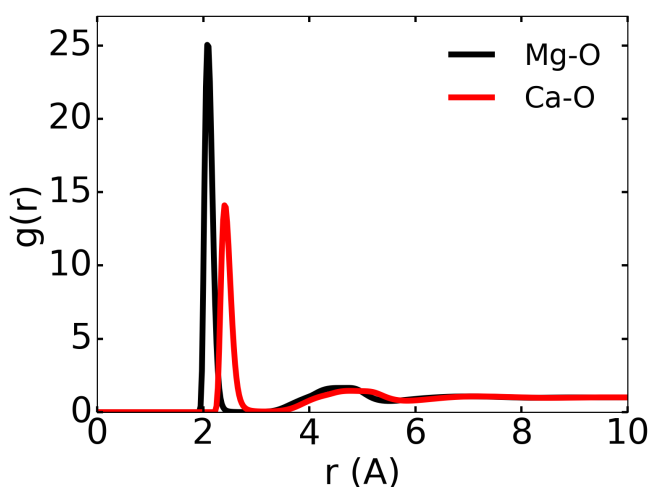

**Fig. S10.**  $g(r)$  between divalent ion and water computed from RISM theory.

## References

- 247 1. NA Denesyuk, D Thirumalai, How do metal ions direct ribozyme folding? *Nat. Chem.* **7**, 793–801 (2015).
- 248 2. D Chandler, HC Andersen, Optimized Cluster Expansions for Classical Fluids. II. Theory of Molecular Liquids. *J. Chem.*
- 249 *Phys.* **57**, 1930–1937 (1972).
- 250 3. F Hirata, P Rossky, An extended RISM equation for molecular polar fluids. *Chem. Phys. Lett.* **83**, 329–334 (1981).
- 251 4. F Hirata, B Pettitt, P Rossky, Application of an extended RISM equation to dipolar and quadrupolar fluids. *J. Chem.*
- 252 *Phys.* **77**, 509–520 (1982).
- 253 5. BM Pettitt, PJ Rossky, Integral equation predictions of liquid state structure for waterlike intermolecular potentials. *J.*
- 254 *Chem. Phys.* **77**, 1451–1457 (1982).
- 255 6. T Luchko, IS Joung, DA Case, Chapter 4: Integral Equation Theory of Biomolecules and Electrolytes in *Innovations in*
- 256 *Biomolecular Modeling and Simulations: Volume 1*. (The Royal Society of Chemistry), pp. 51–86 (2012).
- 257 7. F Hirata, Theory of Molecular Liquids in *Molecular Theory of Solvation*, Understanding Chemical Reactivity, ed. F Hirata.
- 258 (Springer Netherlands) No. 24, pp. 1–60 (2004).
- 259 8. EL Ratkova, DS Palmer, MV Fedorov, Solvation Thermodynamics of Organic Molecules by the Molecular Integral Equation
- 260 Theory: Approaching Chemical Accuracy. *Chem. Rev.* **115**, 6312–6356 (2015).
- 261 9. IS Joung, T Luchko, DA Case, Simple electrolyte solutions: Comparison of DRISM and molecular dynamics results for
- 262 alkali halide solutions. *J. Chem. Phys.* **138**, 044103 (2013).
- 263 10. J Perkyms, BM Pettitt, A site-site theory for finite concentration saline solutions. *J. Chem. Phys.* **97**, 7656–7666 (1992).
- 264 11. A Kovalenko, F Hirata, Self-consistent description of a metal-water interface by the Kohn-Sham density functional theory
- 265 and the three-dimensional reference interaction site model. *J. Chem. Phys.* **110**, 10095–10112 (1999).
- 266

- 267 12. SM Kast, T Kloss, Closed-form expressions of the chemical potential for integral equation closures with certain bridge  
268 functions. *J. Chem. Phys.* **129**, 236101 (2008).
- 269 13. T Luchko, et al., Three-Dimensional Molecular Theory of Solvation Coupled with Molecular Dynamics in Amber. *J.*  
270 *Chem. Theory Comput.* **6**, 607–624 (2010).
- 271 14. P Li, KM Merz, Taking into Account the Ion-Induced Dipole Interaction in the Nonbonded Model of Ions. *J. Chem.*  
272 *Theory Comput.* **10**, 289–297 (2014).
- 273 15. P Li, KM Merz, Metal Ion Modeling Using Classical Mechanics. *Chem. Rev.* **117**, 1564–1686 (2017).
- 274 16. MT Panteva, GM Giambasu, DM York, Force Field for  $Mg^{2+}$ ,  $Mn^{2+}$ ,  $Zn^{2+}$ , and  $Cd^{2+}$  Ions That Have Balanced Interactions  
275 with Nucleic Acids. *J. Phys. Chem. B* **119**, 15460–15470 (2015).
- 276 17. P Li, BP Roberts, DK Chakravorty, KM Merz, Rational Design of Particle Mesh Ewald Compatible Lennard-Jones  
277 Parameters for +2 Metal Cations in Explicit Solvent. *J. Chem. Theory Comput.* **9**, 2733–2748 (2013).
- 278 18. C Hyeon, D Thirumalai, Mechanical unfolding of RNA hairpins. *Proc. Natl. Acad. Sci.* **102**, 6789–6794 (2005).
- 279 19. NA Denesyuk, D Thirumalai, Coarse-Grained Model for Predicting RNA Folding Thermodynamics. *J. Phys. Chem. B*  
280 **117**, 4901–4911 (2013).
- 281 20. H Zheng, IG Shabalin, KB Handing, JM Bujnicki, W Minor, Magnesium-binding architectures in RNA crystal structures:  
282 validation, binding preferences, classification and motif detection. *Nucl. Acids Res.* **43**, 3789–3801 (2015).
- 283 21. DE Condon, et al., Stacking in RNA: NMR of Four Tetramers Benchmark Molecular Dynamics. *J. Chem. Theory Comput.*  
284 **11**, 2729–2742 (2015).
- 285 22. CA Theimer, LD Finger, L Trantirek, J Feigon, Mutations linked to dyskeratosis congenita cause changes in the structural  
286 equilibrium in telomerase RNA. *Proc. Natl. Acad. Sci.* **100**, 449–454 (2003).
- 287 23. PL Nixon, DP Giedroc, Energetics of a strongly pH dependent RNA tertiary structure in a frameshifting pseudoknot. *J.*  
288 *Mol. Biol.* **296**, 659–671 (2000).
- 289 24. YX Wang, M Lu, DE Draper, Specific ammonium ion requirement for functional ribosomal RNA tertiary structure.  
290 *Biochemistry* **32**, 12279–12282 (1993).
- 291 25. S Haider, GN Parkinson, S Neidle, Crystal structure of the potassium form of an *Oxytricha nova* G-quadruplex. *J. Mol.*  
292 *Biol.* **320**, 189–200 (2002).
- 293 26. J Li, JJ Correia, L Wang, JO Trent, JB Chaires, Not so crystal clear: the structure of the human telomere G-quadruplex  
294 in solution differs from that present in a crystal. *Nucl. Acids Res.* **33**, 4649–4659 (2005).
- 295 27. GS Manning, The molecular theory of polyelectrolyte solutions with applications to the electrostatic properties of  
296 polynucleotides. *Quart. Rev. Biophys.* **11**, 179–246 (1978).
- 297 28. Y Bai, et al., Quantitative and Comprehensive Decomposition of the Ion Atmosphere around Nucleic Acids. *J. Am. Chem.*  
298 *Soc.* **129**, 14981–14988 (2007).
- 299 29. SA Pabit, et al., Counting Ions around DNA with Anomalous Small-Angle X-ray Scattering. *J. Am. Chem. Soc.* **132**,  
300 16334–16336 (2010).
- 301 30. HT Nguyen, SA Pabit, L Pollack, DA Case, Extracting water and ion distributions from solution X-ray scattering  
302 experiments. *J. Chem. Phys.* **144**, 214105 (2016).
- 303 31. JD Honeycutt, D Thirumalai, The nature of folded states of globular proteins. *Biopolymers* **32**, 695–709 (1992).
- 304 32. Y Sugita, A Kitao, Y Okamoto, Multidimensional replica-exchange method for free-energy calculations. *J. Chem. Phys.*  
305 **113**, 6042–6051 (2000).
- 306 33. RB Best, G Hummer, WA Eaton, Native contacts determine protein folding mechanisms in atomistic simulations. *Proc.*  
307 *Natl. Acad. Sci.* **110**, 17874–17879 (2013).
- 308 34. AM Soto, V Misra, DE Draper, Tertiary Structure of an RNA Pseudoknot Is Stabilized by “Diffuse”  $Mg^{2+}$  Ions.  
309 *Biochemistry* **46**, 2973–2983 (2007).
- 310 35. D Grilley, V Misra, G Caliskan, DE Draper, Importance of Partially Unfolded Conformations for  $Mg^{2+}$ -Induced Folding  
311 of RNA Tertiary Structure: Structural Models and Free Energies of  $Mg^{2+}$  Interactions. *Biochemistry* **46**, 10266–10278  
312 (2007).
